# Supplementary material for: Feminizing Wolbachia: a transcriptomics approach with insights on the immune response genes in Armadillidium vulgare
Source: PubMed Central journal article supplement (PMC3287506; doi:10.1186/1471-2180-12-s1-s1), 2012-01-18
Supplement: 1471-2180-12-S1-S1-S1.pdf [file 1471-2180-12-S1-S1-S1.pdf]

| Gene Name                   | Accession number | Forward primer          | Reverse primer            | Amplicon length (pb) |
|-----------------------------|------------------|-------------------------|---------------------------|----------------------|
| $\alpha_2$ -macroglobulin A | EU216753.1       | ATTGTGGCTCGGGAAC        | CTCTGGCTGAGTCTGGA         | 192                  |
| $\alpha_2$ -macroglobulin B | FQ905899         | GTCAGCGAGACTTATACATTACC | GCAGCTAACGCTTCATCA        | 155                  |
| $\alpha_2$ -macroglobulin C | FQ885631         | GATGGGGACGACAATAAAG     | ATTCGTTTGGAGGTGGTA        | 187                  |
| $\alpha_2$ -macroglobulin D | FQ899211         | TGCTGTAACAGGCAGT        | GTGAACGAGTCCTCCG          | 262                  |
| $\alpha_2$ -macroglobulin E | FQ893750         | GACACTGTAGTCGCCC        | TCGTAAGGCACCCTGA          | 225                  |
| AIF-like                    | FQ898988         | ATTCTCCAGTCTCCATCGG     | GGCTATTCCAACCACCTTT       | 241                  |
| ALF 1                       | FQ895095         | AGTTTATGGTCCGATGGTGA    | GAAGTCCTTCGTGGCCT         | 186                  |
| ALF 2                       | FQ893962         | CAGCCACAGAGACT          | ACTCCAACATTCAGAGGT        | 186                  |
| Armadillidin                | AY644458         | GGTGGAGGTGGTGGATTCAA    | TTTAGATGATTATCCTCTGTAGCCG | 150                  |
| Argonaute-like              | FQ906629         | GAAGATTGGAGGCGTGAA      | CGATTGATGGGATTGAGGA       | 142                  |
| Astakine                    | FQ904075         | AGAAAATGACTCCGAATCAG    | GCTTCAGGTAAATGTATCGTT     | 200                  |
| ATG7                        | FQ892863         | TCCTCAAATTCTCCACAACA    | TCTATCGCGTCCAAATCC        | 191                  |
| ATG12                       | FQ896457         | CTTTGCTCCATCACCAGA      | TTCATCCTCGCCTCAAAC        | 198                  |
| BIP2                        | FQ898092         | CATTTCCCTCACAAAGTTCC    | CCATTACCCTCTCATCACC       | 216                  |
| Cyclophylin G               | EU216759.1       | TAAAGGAGAAGGTTACAAGGG   | GTTTGCCATTGAAAGCCA        | 177                  |
| Crustin 1                   | FQ901343         | AAAGATCGCCACCAGT        | TTTGTACAGTCTCTGGG         | 224                  |
| Crustin 2                   | FQ904008         | CCAGAGACCTCGACCC        | TGATCCCAAACACTACTACCGATA  | 208                  |
| Crustin 3                   | FQ899403         | AAGCAGTCGATCCATCT       | ACGGCGCTTTACAAAC          | 255                  |
| ECSIT                       | FQ905410         | AATGGTTTGCTGTCCTCTTC    | CCCGAATAGTCTTTCTTGT       | 139                  |
| Elongation Factor 2         | FQ896398         | GTCAGATCATTCCCACAACA    | TTTCCTCAAATACCACTCCAC     | 164                  |
| Ferritin A                  | FQ887056         | AGAACGTGAACATGCC        | CGCAACTGTCTCCCTT          | 191                  |
| Ferritin B                  | FQ889513         | GGGCTTCAGGATATTCTTTCTC  | ACTCTAGAAATAATGTGGCCAA    | 170                  |
| Ferritin C                  | FQ906089         | AAGCAAGTAAACCAGTCCC     | ATAGCCTCAACCTGTTCTTC      | 117                  |
| i-type lysozyme             | FQ902565         | TCCGTTCTCATCTCGTAT      | ACCATCTCCATTACAATCCTG     | 171                  |
| Kinesin1                    | FQ904911         | AATAAGAACAAAGCAGAGTCGG  | AGATACATCCATTTCAACCACC    | 104                  |
| C-type lectin 1             | FQ900396         | GGGAGCCTGTTACGAT        | GCCATACAAAGCGGAG          | 205                  |
| C-type lectin 2             | FQ892973         | ATCGGCGGAAACTACA        | CCCATCGCTACCTCCA          | 183                  |
| C-type lectin 3             | FQ906953         | GGCTCACACCTTGCTTATATC   | TTCTTACAGGGTAACCATTGCC    | 143                  |
| Masquerade-like A           | ABY64694.1       | ACACTTTGCGTCACAAC       | CCTCCATCACCGTAGC          | 209                  |
| Masquerade-like B           | FQ900550         | ACATCGTACATGCGAAAC      | TCCACCCAGTGAAGTAA         | 255                  |
| MyD88-like                  | FQ906745         | TTGTGGATTGAGAAAGGAGG    | GCTGTCTGTATATCTTCGTCA     | 181                  |
| Glutathione peroxidase      | FQ900254         | TACTGAGGTATGAGCAACGC    | TGGACGGACGTATTTGACT       | 165                  |
| Peroxinectin-like A         | FQ893953         | TCCCTCGTTGGTCCAC        | ACATGGGTAGCATCAGT         | 182                  |
| Peroxinectin-like B         | FQ893964         | ATTGGACGACACTCGG        | AGATGGGCCAAACCAG          | 225                  |
| Peroxiredoxin A             | FQ903144         | TCTCACCTTGCATGGG        | CTGGAACGCTTGTACC          | 246                  |
| Peroxiredoxin B             | FQ899986         | TCCCTTATCTGCTACTACC     | GAAATTGCTTCTTGCTTCT       | 167                  |
| Peroxiredoxin C             | FQ889661         | GTCTTGGTGGTCTAGCTTATC   | TATGAGAAACAATCCGCGAA      | 112                  |

|                      |            |                         |                        |     |
|----------------------|------------|-------------------------|------------------------|-----|
| Peroxiredoxin-like D | FQ886901   | GGGAGGTAACTTTGTTTATACT  | CCCATGAATCTCCAAGGAAAT  | 177 |
| Piwi                 | FQ899145   | ATATGATGATTGGGTATGATGCT | ATCCCTGAACACAACACTACTG | 229 |
| SOCS2-like           | FQ907205   | GTGAGAACAACCTTTACCCAAG  | TTTCGTGTCAAGTCCTGTCT   | 220 |
| Cu/Zn SOD            | FQ893604   | AAAGTGTAGCTCGGCG        | CCAGCGTTTCCAGTCT       | 261 |
| Mn SOD               | ABY64695.1 | AACTGGTGCTATCGCC        | ACCCAACCTGCACTGGA      | 181 |
| RbL8                 | FQ895433   | AACTGGAGATAGAGGCAAA     | CCACCAGCAGCAATTC       | 159 |
| Runt                 | FQ891956   | AAGTCGGGGATGGAAC        | GGGAGGAGTCGTACTGA      | 185 |
| Thioredoxin A        | FQ899701   | CCCAAATTCTGCCAGTT       | TTTCCGATTCATTTAGGCATTC | 235 |
| Thioredoxin B        | FQ893083   | AGACCCTGTTTAGATTCCAAAG  | CGAGGTACTTCTCATGTTGTT  | 123 |
| Transglutaminase A   | EU216757   | AGGGAGTCTTAGTTGGC       | CGGGTCTACAAGGGAT       | 189 |
| Transglutaminase B   | FQ893748   | AGACGTTGAACGTGTGC       | AGTGTCCGAGACTCTCC      | 189 |

---
