# Supplementary material for: Feminizing Wolbachia: a transcriptomics approach with insights on the immune response genes in Armadillidium vulgare
Source: PubMed Central journal article supplement (PMC3287506; doi:10.1186/1471-2180-12-s1-s1), 2012-01-18
Supplement: 1471-2180-12-S1-S1-S2.pdf [file 1471-2180-12-S1-S1-S2.pdf]

| Accession number of ESTs corresponding to over-represented unigenes | Rj   | Accession number    | Description                                                                         | OS   | OA       | N | SSH-S | SSH-A | SSH-C | SSH-NC   | Description                    | Length | mean Sim | GOs                                                                                                                                                                                                                                                                                                                                                                                                                                                                                                                                                                                            | Enzyme codes | InterProScan |
|---------------------------------------------------------------------|------|---------------------|-------------------------------------------------------------------------------------|------|----------|---|-------|-------|-------|----------|--------------------------------|--------|----------|------------------------------------------------------------------------------------------------------------------------------------------------------------------------------------------------------------------------------------------------------------------------------------------------------------------------------------------------------------------------------------------------------------------------------------------------------------------------------------------------------------------------------------------------------------------------------------------------|--------------|--------------|
| FQ892049                                                            | 5,7  | NA                  | NA                                                                                  | 0    | 27       | 0 | 0     | 0     | 0     | 3        | activin atype iia              | 664    | 42.25%   | F:transferase activity; F:transmembrane receptor protein serine/threonine kinase activity; P:transmembrane receptor protein serine/threonine kinase signaling pathway; C:integral to membrane; F:protein serine/threonine kinase activity; C:membrane; F:protein kinase activity; F:transforming growth factor beta receptor activity; F:nucleotide binding; P:protein amino acid phosphorylation; F:ATP binding; F:kinase activity; F:receptor activity; F:metal ion binding; F:magnesium ion binding; F:manganese ion binding; F:receptor signaling protein serine/threonine kinase activity | NA           | noIPR        |
| FQ887701                                                            | 2,5  | NA                  | NA                                                                                  | 6    | 0        | 7 | 0     | 0     | 0     | 0        | ---NA---                       | 765    |          |                                                                                                                                                                                                                                                                                                                                                                                                                                                                                                                                                                                                | NA           | no IPS match |
| FQ890062                                                            | 2,1  | NA                  | NA                                                                                  | 0    | 10       | 8 | 0     | 0     | 0     | 0        | ---NA---                       | 873    | 50.6%    |                                                                                                                                                                                                                                                                                                                                                                                                                                                                                                                                                                                                | NA           | no IPS match |
| FQ892189                                                            | 2,1  | NA                  | NA                                                                                  | 0    | 10       | 0 | 0     | 0     | 0     | 0        | cation-transporting atpase     | 634    | 50.0%    |                                                                                                                                                                                                                                                                                                                                                                                                                                                                                                                                                                                                | NA           | noIPR        |
| FQ886179                                                            | 2,08 | B0X7W3 B0X7W3_CULQU | Putative uncharacterized protein - Culex quinquefasciatus (Southern house mosquito) | 5    | 0        | 1 | 0     | 0     | 0     | 0        | set and mynd domain-containing | 1092   | 50.0%    | C:nucleus                                                                                                                                                                                                                                                                                                                                                                                                                                                                                                                                                                                      | NA           | noIPR        |
| FQ886823                                                            | 2,08 | Q7ZXG5 Q7ZXG5_XENLA | :3081 protein - Xenopus laevis (African clawed frog)                                | 5,00 | 0,00E+00 | 0 | 0     | 0,00  | 0,00  | 0,00E+00 | ubiquitinisoform cra_a         | 725    | 98.9%    |                                                                                                                                                                                                                                                                                                                                                                                                                                                                                                                                                                                                | NA           | no IPS match |
