# Supplementary material for: Feminizing Wolbachia: a transcriptomics approach with insights on the immune response genes in Armadillidium vulgare
Source: PubMed Central journal article supplement (PMC3287506; doi:10.1186/1471-2180-12-s1-s1), 2012-01-18
Supplement: 1471-2180-12-S1-S1-S3.pdf [file 1471-2180-12-S1-S1-S3.pdf]

|                 | <b>Biological process</b>                                 | <b>GO accession</b> | <b>A</b> | <b>S</b> | <b>A/S</b>  |
|-----------------|-----------------------------------------------------------|---------------------|----------|----------|-------------|
| <b>AO ~ SO</b>  | mitotic sister chromatid segregation                      | GO:0000070          | 0,05     | 0,09     | <b>0,56</b> |
| <b>level 4</b>  | meiotic spindle organization and biogenesis               | GO:0000212          | 0,02     | 0,02     | <b>1,00</b> |
| <b>(n= 217)</b> | sister chromatid segregation                              | GO:0000819          | 0,05     | 0,09     | <b>0,56</b> |
|                 | regulation of action potential                            | GO:0001508          | 0,00     | 0,02     | <b>0,00</b> |
|                 | response to hypoxia                                       | GO:0001666          | 0,04     | 0,05     | <b>0,80</b> |
|                 | blastocyst development                                    | GO:0001824          | 0,04     | 0,07     | <b>0,57</b> |
|                 | regulation of systemic arterial blood pressure by hormone | GO:0001990          | 0,11     | 0,14     | <b>0,79</b> |
|                 | leukocyte mediated immunity                               | GO:0002443          | 0,02     | 0,02     | <b>1,00</b> |
|                 | regulation of immune effector process                     | GO:0002697          | 0,04     | 0,14     | <b>0,29</b> |
|                 | aldehyde metabolic process                                | GO:0006081          | 0,07     | 0,11     | <b>0,64</b> |
|                 | electron transport                                        | GO:0006118          | 3,82     | 6,14     | <b>0,62</b> |
|                 | vitamin metabolic process                                 | GO:0006766          | 0,14     | 0,21     | <b>0,67</b> |
|                 | oxygen and reactive oxygen species metabolic process      | GO:0006800          | 0,00     | 0,02     | <b>0,00</b> |
|                 | smooth muscle contraction                                 | GO:0006939          | 0,02     | 0,02     | <b>1,00</b> |
|                 | humoral immune response                                   | GO:0006959          | 0,11     | 0,14     | <b>0,79</b> |
|                 | mitotic chromosome condensation                           | GO:0007076          | 0,02     | 0,05     | <b>0,40</b> |
|                 | neurotransmitter secretion                                | GO:0007269          | 0,04     | 0,05     | <b>0,80</b> |
|                 | spermatid development                                     | GO:0007286          | 0,07     | 0,11     | <b>0,64</b> |
|                 | eggshell chorion formation                                | GO:0007306          | 0,04     | 0,05     | <b>0,80</b> |
|                 | neuroblast proliferation                                  | GO:0007405          | 0,02     | 0,02     | <b>1,00</b> |
|                 | sex determination                                         | GO:0007530          | 0,09     | 0,14     | <b>0,64</b> |
|                 | blood coagulation                                         | GO:0007596          | 0,04     | 0,05     | <b>0,80</b> |
|                 | hemostasis                                                | GO:0007599          | 0,04     | 0,05     | <b>0,80</b> |
|                 | regulation of heart contraction                           | GO:0008016          | 0,00     | 0,02     | <b>0,00</b> |
|                 | axon ensheathment                                         | GO:0008366          | 0,00     | 0,02     | <b>0,00</b> |
|                 | response to virus                                         | GO:0009615          | 0,02     | 0,02     | <b>1,00</b> |
|                 | response to toxin                                         | GO:0009636          | 0,00     | 0,05     | <b>0,00</b> |
|                 | alkaloid metabolic process                                | GO:0009820          | 0,02     | 0,02     | <b>1,00</b> |
|                 | carbon utilization by fixation of carbon dioxide          | GO:0015977          | 0,05     | 0,09     | <b>0,56</b> |
|                 | energy derivation by oxidation of organic compounds       | GO:0015980          | 0,41     | 1,70     | <b>0,24</b> |
|                 | macroautophagy                                            | GO:0016236          | 0,02     | 0,05     | <b>0,40</b> |
|                 | somatic diversification of immunoglobulins                | GO:0016445          | 0,02     | 0,02     | <b>1,00</b> |
|                 | viral genome replication                                  | GO:0019079          | 0,02     | 0,02     | <b>1,00</b> |
|                 | regulation of lipid metabolic process                     | GO:0019216          | 0,02     | 0,02     | <b>1,00</b> |
|                 | telencephalon development                                 | GO:0021537          | 0,02     | 0,02     | <b>1,00</b> |
|                 | eggshell formation                                        | GO:0030703          | 0,04     | 0,05     | <b>0,80</b> |
|                 | oocyte fate determination                                 | GO:0030716          | 0,02     | 0,02     | <b>1,00</b> |
|                 | hindbrain development                                     | GO:0030902          | 0,02     | 0,02     | <b>1,00</b> |
|                 | reproductive behavior in a multicellular organism         | GO:0033057          | 0,04     | 0,05     | <b>0,80</b> |
|                 | regulation of membrane potential                          | GO:0042391          | 0,00     | 0,02     | <b>0,00</b> |
|                 | response to drug                                          | GO:0042493          | 0,07     | 0,09     | <b>0,78</b> |
|                 | nitrogen compound biosynthetic process                    | GO:0044271          | 0,16     | 0,30     | <b>0,53</b> |
|                 | innate immune response                                    | GO:0045087          | 0,02     | 0,02     | <b>1,00</b> |
|                 | homologous chromosome segregation                         | GO:0045143          | 0,02     | 0,02     | <b>1,00</b> |
|                 | germ-line cyst encapsulation                              | GO:0048138          | 0,02     | 0,02     | <b>1,00</b> |
|                 | vesicle docking                                           | GO:0048278          | 0,04     | 0,05     | <b>0,80</b> |
|                 | positive regulation of response to stimulus               | GO:0048584          | 0,05     | 0,11     | <b>0,45</b> |
|                 | regulation of immune response                             | GO:0050776          | 0,04     | 0,14     | <b>0,29</b> |
|                 | negative regulation of multicellular organismal process   | GO:0051241          | 0,04     | 0,05     | <b>0,80</b> |
|                 | regulation of cell motility                               | GO:0051270          | 0,00     | 0,05     | <b>0,00</b> |
|                 | establishment of chromosome localization                  | GO:0051303          | 0,00     | 0,02     | <b>0,00</b> |
|                 | metaphase plate congression                               | GO:0051310          | 0,00     | 0,02     | <b>0,00</b> |

|                 |                                                        |            |      |      |             |
|-----------------|--------------------------------------------------------|------------|------|------|-------------|
|                 | meiotic metaphase plate congression                    | GO:0051311 | 0,00 | 0,02 | <b>0,00</b> |
|                 | establishment of vesicle localization                  | GO:0051650 | 0,04 | 0,07 | <b>0,57</b> |
| <b>AO ~ SO</b>  | mitochondrial genome maintenance                       | GO:0000002 | 0,02 | 0,02 | <b>1,00</b> |
| <b>level 6</b>  | regulation of cyclin-dependent protein kinase activity | GO:0000079 | 0,04 | 0,09 | <b>0,44</b> |
| <b>(n= 220)</b> | G2 phase of mitotic cell cycle                         | GO:0000085 | 0,02 | 0,05 | <b>0,40</b> |
|                 | sulfur amino acid biosynthetic process                 | GO:0000097 | 0,04 | 0,07 | <b>0,57</b> |
|                 | sulfate assimilation                                   | GO:0000103 | 0,02 | 0,02 | <b>1,00</b> |
|                 | achiasmate meiosis I                                   | GO:0000705 | 0,00 | 0,02 | <b>0,00</b> |
|                 | long-chain fatty acid metabolic process                | GO:0001676 | 0,02 | 0,02 | <b>1,00</b> |
|                 | in utero embryonic development                         | GO:0001701 | 0,05 | 0,07 | <b>0,71</b> |
|                 | somitogenesis                                          | GO:0001756 | 0,00 | 0,02 | <b>0,00</b> |
|                 | myeloid leukocyte differentiation                      | GO:0002573 | 0,00 | 0,02 | <b>0,00</b> |
|                 | disaccharide metabolic process                         | GO:0005984 | 0,02 | 0,05 | <b>0,40</b> |
|                 | chitin metabolic process                               | GO:0006030 | 0,00 | 0,02 | <b>0,00</b> |
|                 | tricarboxylic acid cycle                               | GO:0006099 | 0,09 | 0,14 | <b>0,64</b> |
|                 | pyrimidine nucleoside metabolic process                | GO:0006213 | 0,02 | 0,02 | <b>1,00</b> |
|                 | DNA fragmentation during apoptosis                     | GO:0006309 | 0,04 | 0,05 | <b>0,80</b> |
|                 | protein amino acid glycosylation                       | GO:0006486 | 0,05 | 0,16 | <b>0,31</b> |
|                 | protein amino acid lipidation                          | GO:0006497 | 0,02 | 0,02 | <b>1,00</b> |
|                 | cysteine metabolic process                             | GO:0006534 | 0,02 | 0,05 | <b>0,40</b> |
|                 | tryptophan metabolic process                           | GO:0006568 | 0,05 | 0,11 | <b>0,45</b> |
|                 | indolalkylamine metabolic process                      | GO:0006586 | 0,05 | 0,11 | <b>0,45</b> |
|                 | triacylglycerol metabolic process                      | GO:0006641 | 0,04 | 0,07 | <b>0,57</b> |
|                 | phospholipid metabolic process                         | GO:0006644 | 0,12 | 0,18 | <b>0,67</b> |
|                 | porphyrin biosynthetic process                         | GO:0006779 | 0,05 | 0,07 | <b>0,71</b> |
|                 | vesicle coating                                        | GO:0006901 | 0,00 | 0,05 | <b>0,00</b> |
|                 | phagocytosis                                           | GO:0006909 | 0,25 | 0,34 | <b>0,74</b> |
|                 | phagocytosis. engulfment                               | GO:0006911 | 0,25 | 0,34 | <b>0,74</b> |
|                 | mitotic centrosome separation                          | GO:0007100 | 0,04 | 0,05 | <b>0,80</b> |
|                 | Notch signaling pathway                                | GO:0007219 | 0,02 | 0,02 | <b>1,00</b> |
|                 | oocyte dorsal/ventral axis determination               | GO:0007310 | 0,04 | 0,07 | <b>0,57</b> |
|                 | sensory perception of sound                            | GO:0007605 | 0,02 | 0,02 | <b>1,00</b> |
|                 | Toll signaling pathway                                 | GO:0008063 | 0,02 | 0,02 | <b>1,00</b> |
|                 | amino acid biosynthetic process                        | GO:0008652 | 0,12 | 0,30 | <b>0,40</b> |
|                 | phospholipid biosynthetic process                      | GO:0008654 | 0,05 | 0,09 | <b>0,56</b> |
|                 | aerobic respiration                                    | GO:0009060 | 0,34 | 1,68 | <b>0,20</b> |
|                 | glutamine family amino acid metabolic process          | GO:0009064 | 0,09 | 0,14 | <b>0,64</b> |
|                 | aromatic amino acid family biosynthetic process        | GO:0009073 | 0,02 | 0,05 | <b>0,40</b> |
|                 | histidine family amino acid metabolic process          | GO:0009075 | 0,00 | 0,02 | <b>0,00</b> |
|                 | coenzyme catabolic process                             | GO:0009109 | 0,09 | 0,14 | <b>0,64</b> |
|                 | ribonucleoside metabolic process                       | GO:0009119 | 0,05 | 0,07 | <b>0,71</b> |
|                 | nucleoside monophosphate biosynthetic process          | GO:0009124 | 0,05 | 0,11 | <b>0,45</b> |
|                 | oligosaccharide biosynthetic process                   | GO:0009312 | 0,00 | 0,05 | <b>0,00</b> |
|                 | response to gamma radiation                            | GO:0010332 | 0,00 | 0,05 | <b>0,00</b> |
|                 | synaptic vesicle budding                               | GO:0016185 | 0,00 | 0,05 | <b>0,00</b> |
|                 | benzoate metabolic process                             | GO:0018874 | 0,05 | 0,07 | <b>0,71</b> |
|                 | hexose metabolic process                               | GO:0019318 | 0,21 | 0,28 | <b>0,75</b> |
|                 | pyridine nucleotide metabolic process                  | GO:0019362 | 0,05 | 0,09 | <b>0,56</b> |
|                 | T cell differentiation                                 | GO:0030217 | 0,00 | 0,05 | <b>0,00</b> |
|                 | chromosome condensation                                | GO:0030261 | 0,02 | 0,07 | <b>0,29</b> |
|                 | apoptotic nuclear changes                              | GO:0030262 | 0,04 | 0,07 | <b>0,57</b> |
|                 | regulation of protein stability                        | GO:0031647 | 0,02 | 0,09 | <b>0,22</b> |

|                                                               |            |      |      |             |
|---------------------------------------------------------------|------------|------|------|-------------|
| tetrapyrrole biosynthetic process                             | GO:0033014 | 0,05 | 0,07 | <b>0,71</b> |
| eye photoreceptor cell development                            | GO:0042462 | 0,02 | 0,02 | <b>1,00</b> |
| organelle ATP synthesis coupled electron transport            | GO:0042775 | 3,04 | 5,36 | <b>0,57</b> |
| positive regulation of apoptosis                              | GO:0043065 | 0,11 | 0,18 | <b>0,61</b> |
| biopolymer methylation                                        | GO:0043414 | 0,09 | 0,14 | <b>0,64</b> |
| regulation of kinase activity                                 | GO:0043549 | 0,18 | 0,28 | <b>0,64</b> |
| cellular protein complex assembly                             | GO:0043623 | 0,05 | 0,21 | <b>0,24</b> |
| dicarboxylic acid metabolic process                           | GO:0043648 | 0,04 | 0,16 | <b>0,25</b> |
| cellular carbohydrate catabolic process                       | GO:0044275 | 0,16 | 0,23 | <b>0,70</b> |
| indolalkylamine biosynthetic process                          | GO:0046219 | 0,02 | 0,05 | <b>0,40</b> |
| monosaccharide catabolic process                              | GO:0046365 | 0,11 | 0,23 | <b>0,48</b> |
| acylglycerol biosynthetic process                             | GO:0046463 | 0,00 | 0,07 | <b>0,00</b> |
| retinal cell programmed cell death                            | GO:0046666 | 0,02 | 0,02 | <b>1,00</b> |
| regulation of compound eye retinal cell programmed cell death | GO:0046669 | 0,02 | 0,02 | <b>1,00</b> |
| negative regulation of retinal cell programmed cell death     | GO:0046671 | 0,02 | 0,02 | <b>1,00</b> |
| lipid phosphorylation                                         | GO:0046834 | 0,00 | 0,09 | <b>0,00</b> |
| positive regulation of lipid biosynthetic process             | GO:0046889 | 0,02 | 0,02 | <b>1,00</b> |
| synaptic vesicle endocytosis                                  | GO:0048488 | 0,02 | 0,05 | <b>0,40</b> |
| positive regulation of transferase activity                   | GO:0051347 | 0,04 | 0,05 | <b>0,80</b> |
| negative regulation of transferase activity                   | GO:0051348 | 0,00 | 0,02 | <b>0,00</b> |
| oocyte nucleus localization during oocyte axis determination  | GO:0051663 | 0,02 | 0,02 | <b>1,00</b> |

---
