# Supplementary material for: Feminizing Wolbachia: a transcriptomics approach with insights on the immune response genes in Armadillidium vulgare
Source: PubMed Central journal article supplement (PMC3287506; doi:10.1186/1471-2180-12-s1-s1), 2012-01-18
Supplement: 1471-2180-12-S1-S1-S4.pdf [file 1471-2180-12-S1-S1-S4.pdf]

| Library    | Number of immune unigenes | BLAST identification  | EST accession number |
|------------|---------------------------|-----------------------|----------------------|
| SSH-C      | 31                        | Serine protease       | FQ893761             |
|            |                           | Serine protease       | FQ893667             |
|            |                           | Serine protease       | FQ893623             |
|            |                           | Serine protease       | FQ893394             |
|            |                           | Serine protease       | FQ893914             |
|            |                           | Serpin                | FQ893681             |
|            |                           | Serpin                | FQ893573             |
|            |                           | Serpin                | FQ893895             |
|            |                           | Serpin                | FQ893888             |
|            |                           | alpha-2 macroglobilin | FQ893810             |
|            |                           | alpha-2 macroglobilin | FQ893384             |
|            |                           | alpha-2 macroglobilin | FQ893750             |
|            |                           | SOD                   | FQ893491             |
|            |                           | SOD                   | FQ893604             |
|            |                           | Thioredoxin           | FQ893739             |
|            |                           | Thioredoxin           | FQ893583             |
|            |                           | Ferritin              | FQ893815             |
|            |                           | Ovoperoxidase         | FQ893638             |
|            |                           | Salivary peroxidase   | FQ893265             |
|            |                           | Hemolymph proteinase  | FQ893669             |
|            |                           | Hemocyanin            | FQ893601             |
|            |                           | Masquerade            | FQ893563             |
|            |                           | Masquerade            | FQ893636             |
|            |                           | Cathepsin             | FQ893968             |
|            |                           | Cathepsin             | FQ893917             |
|            |                           | Cathepsin             | FQ893627             |
|            |                           | Coagulation           | FQ893366             |
|            |                           | Coagulation           | FQ893759             |
|            |                           | Transglutaminase      | FQ893748             |
|            |                           | Catalase              | FQ893488             |
|            |                           | Catalase              | FQ893510             |
| ALF        | FQ893962                  |                       |                      |
| SSH-NC     | 29                        | Cniwi                 | FQ894315             |
|            |                           | Kallikrein            | FQ894504             |
|            |                           | Cathepsin             | FQ894158             |
|            |                           | Cathepsin             | FQ894300             |
|            |                           | Cathepsin             | FQ894626             |
|            |                           | Cathepsin             | FQ894347             |
|            |                           | Cathepsin             | FQ894150             |
|            |                           | Cathepsin             | FQ894548             |
|            |                           | Cathepsin             | FQ894418             |
|            |                           | Cathepsin             | FQ894512             |
|            |                           | Cathepsin             | FQ894234             |
|            |                           | Cathepsin             | FQ894583             |
|            |                           | Cathepsin             | FQ894379             |
|            |                           | Cathepsin             | FQ894370             |
|            |                           | Cathepsin             | FQ894326             |
|            |                           | Cathepsin             | FQ894229             |
|            |                           | Cathepsin             | FQ894083             |
|            |                           | Cathepsin             | FQ894021             |
|            |                           | Cathepsin             | FQ893994             |
|            |                           | Cathepsin             | FQ893988             |
| Hemocyanin | FQ894523                  |                       |                      |
| Hemocyanin | FQ894494                  |                       |                      |
| Hemocyanin | FQ894164                  |                       |                      |
| Hemocyanin | FQ894087                  |                       |                      |
| Hemocyanin | FQ894168                  |                       |                      |

|              |    |                        |          |
|--------------|----|------------------------|----------|
|              |    | Hemocyanin             | FQ894161 |
|              |    | Hemocyanin             | FQ893990 |
|              |    | 14-3-3 protein         | FQ894275 |
|              |    | ppaF                   | FQ891505 |
| <b>SSH-S</b> | 1  | Serine protease        | FQ892721 |
| <b>SSH-A</b> | 6  | Vasa                   | FQ892823 |
|              |    | C-type lectin          | FQ892973 |
|              |    | Thioredoxin            | FQ893083 |
|              |    | Thioredoxin            | FQ893118 |
|              |    | ppaF                   | FQ892839 |
|              |    | Kallikrein             | FQ893020 |
| <b>OS</b>    | 15 | Serine protease        | FQ887028 |
|              |    | Serine protease        | FQ885101 |
|              |    | Glutathione peroxidase | FQ887758 |
|              |    | Glutathione peroxidase | FQ886901 |
|              |    | Thioredoxin peroxidase | FQ884946 |
|              |    | Thioredoxin            | FQ887737 |
|              |    | SOD                    | FQ887525 |
|              |    | alpha-2 macroglobilin  | FQ885631 |
|              |    | Lectin                 | FQ887089 |
|              |    | Lectin                 | FQ885351 |
|              |    | Ferritin               | FQ887056 |
|              |    | Kallikrein             | FQ886276 |
|              |    | ppaF                   | FQ886787 |
|              |    | Vasa                   | FQ885102 |
|              |    | Calreticulin           | FQ885078 |
| <b>OA</b>    | 21 | Serine protease        | FQ890866 |
|              |    | Ferritin               | FQ889498 |
|              |    | Thioredoxin            | FQ891067 |
|              |    | Thioredoxin            | FQ888463 |
|              |    | Thioredoxin            | FQ889351 |
|              |    | Thioredoxin peroxidase | FQ889661 |
|              |    | Masquerade             | FQ887977 |
|              |    | Cathepsin              | FQ891314 |
|              |    | Cathepsin              | FQ888267 |
|              |    | Cathepsin              | FQ889870 |
|              |    | Lectin                 | FQ888287 |
|              |    | Lectin                 | FQ888908 |
|              |    | Runt                   | FQ891956 |
|              |    | Kallikrein             | FQ890153 |
|              |    | Kallikrein             | FQ890190 |
|              |    | Autophagy protein      | FQ888699 |
|              |    | Vasa                   | FQ889550 |
|              |    | Piwi                   | FQ889702 |
|              |    | Ferritin               | FQ889704 |
|              |    | Calreticulin           | FQ889703 |
|              |    | Bip2                   | FQ892076 |

---
