# Supplementary material for: Feminizing Wolbachia: a transcriptomics approach with insights on the immune response genes in Armadillidium vulgare
Source: PubMed Central journal article supplement (PMC3287506; doi:10.1186/1471-2180-12-s1-s1), 2012-01-18
Supplement: 1471-2180-12-S1-S1-S5.pdf [file 1471-2180-12-S1-S1-S5.pdf]

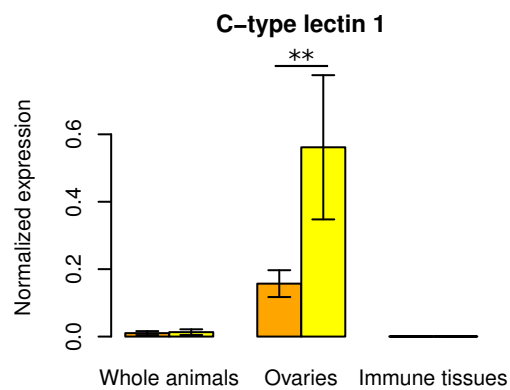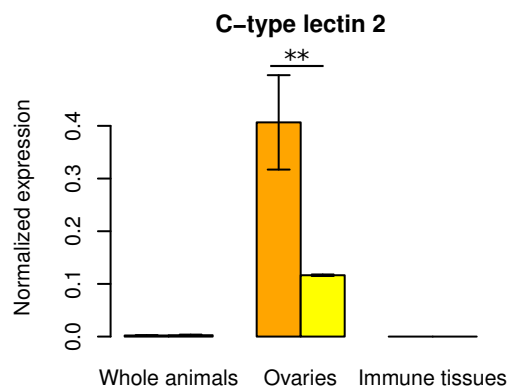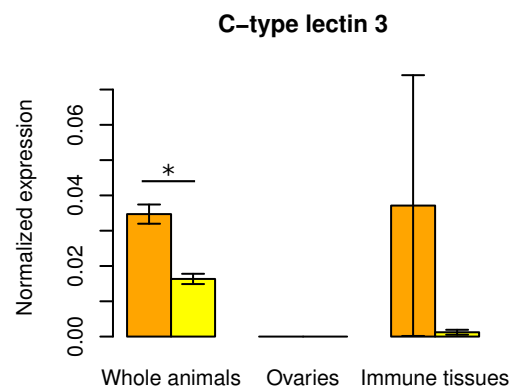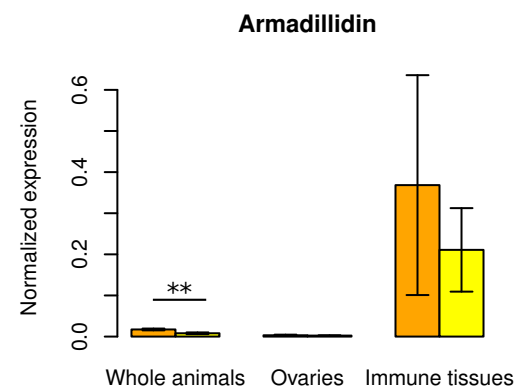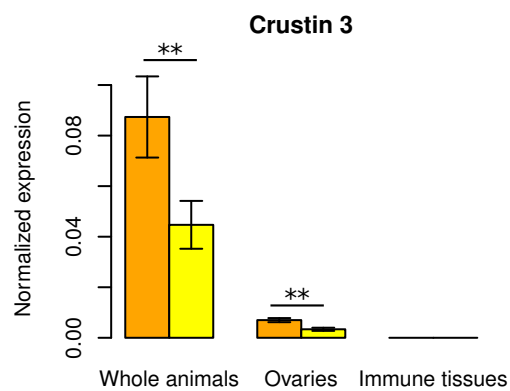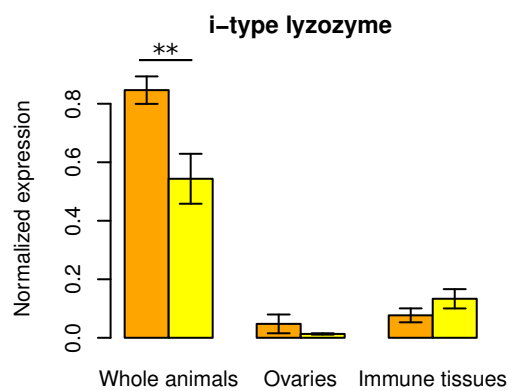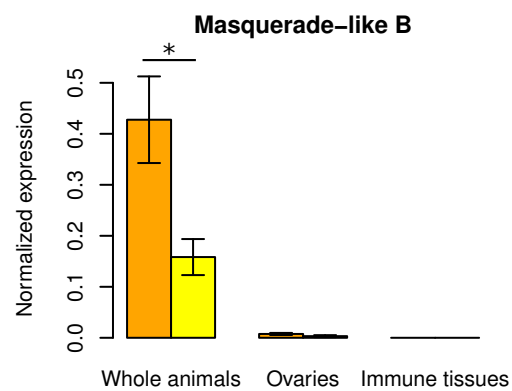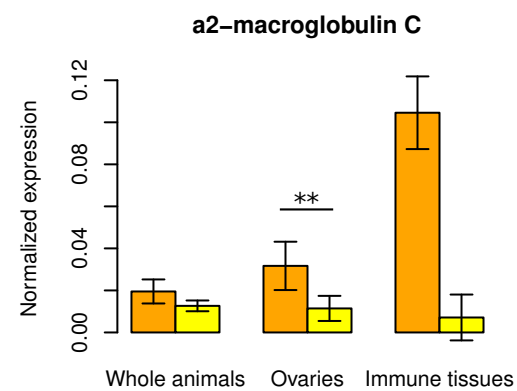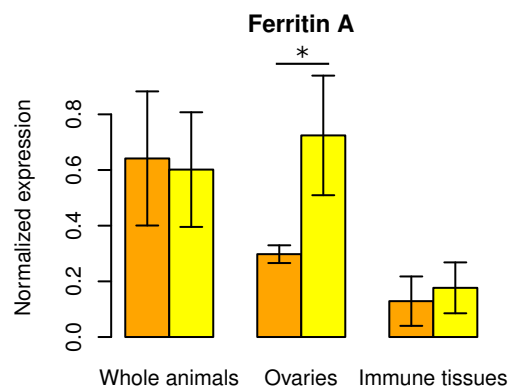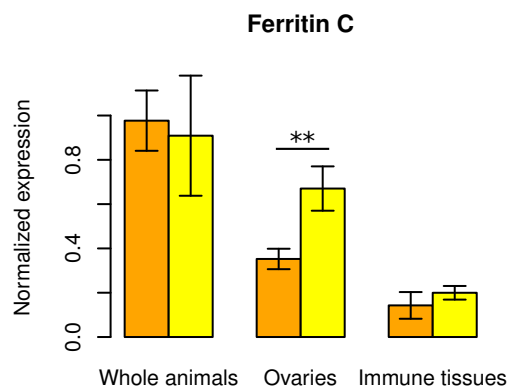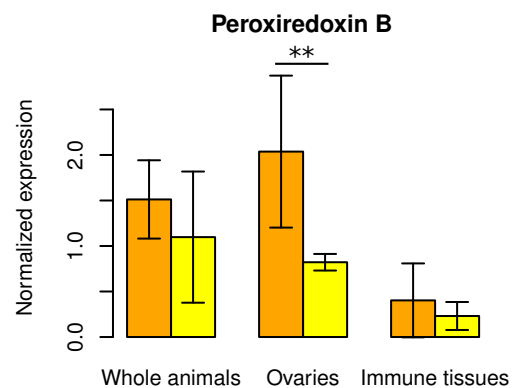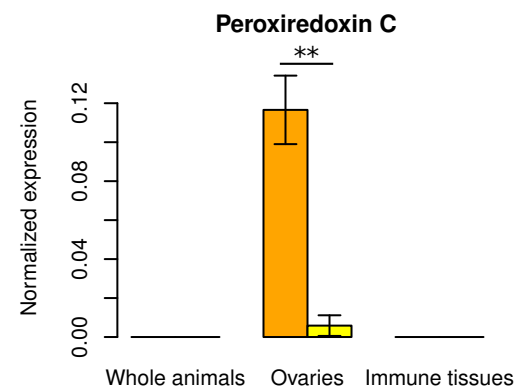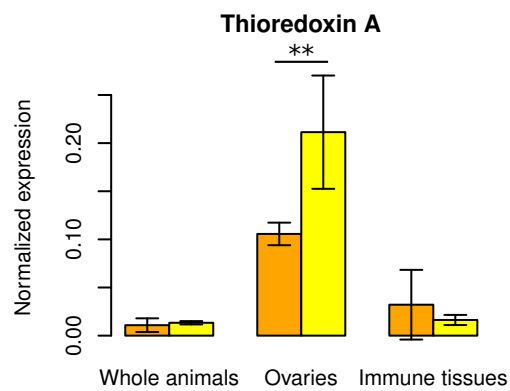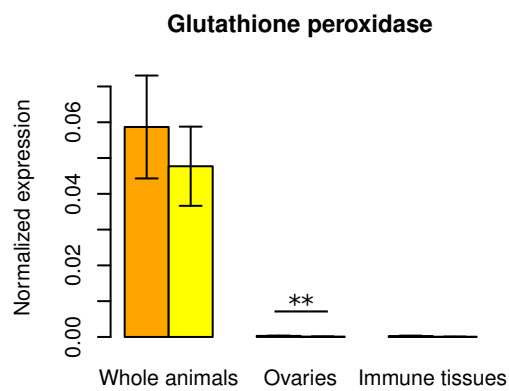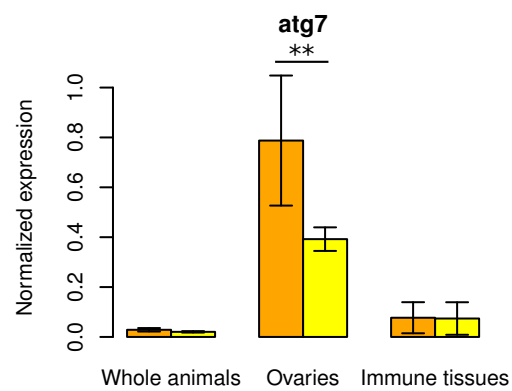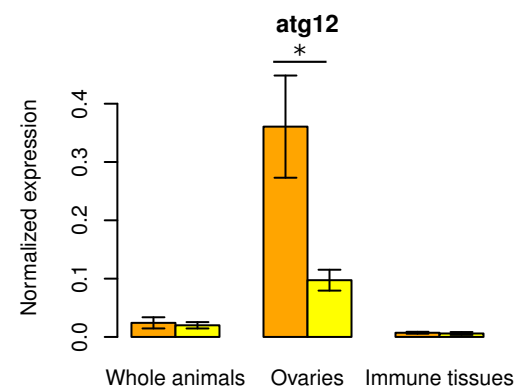

Asymbiotic females  
Symbiotic females
